# Supplementary material for: Genome-Wide Association Study Identifies a Rice Panicle Blast Resistance Gene Pb3 Encoding NLR Protein
Source: MDPI journal article supplement (doi:10.3390/ijms232214032), 2022-11-14
Supplement: s1 [file s1]

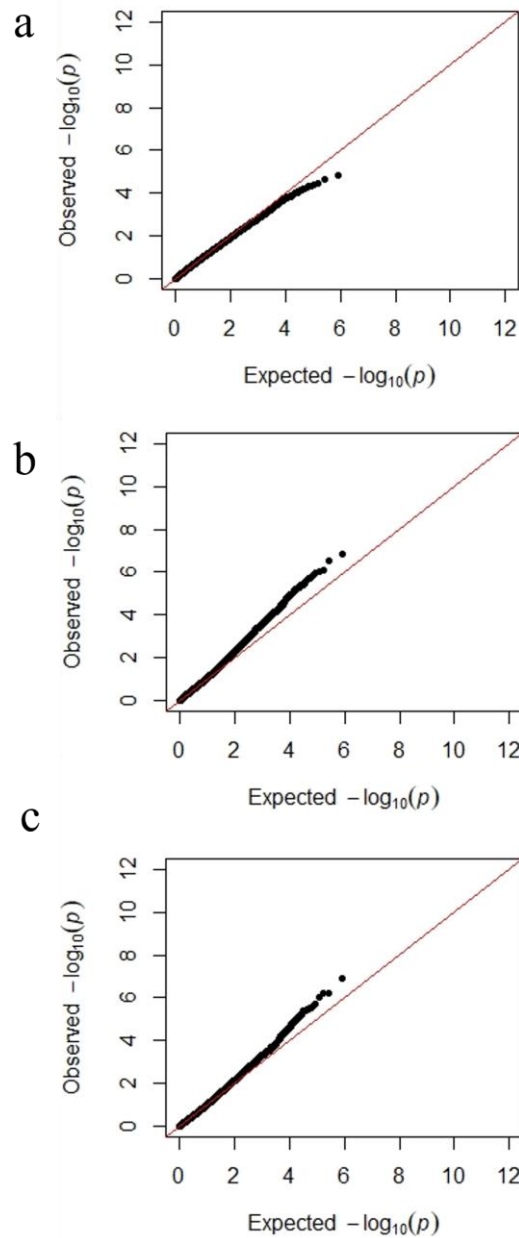

**Figure S1** Quantile-quantile (Q-Q) plots for the GWAS analysis of panicle blast resistant loci. (Q-Q) plots show the fitness of selected models for different traits data (a)2017,(b)2018, (c)2019. X-axis: expected  $-\log_{10} P$ ; Y-axis: observed  $-\log_{10} (P)$ .

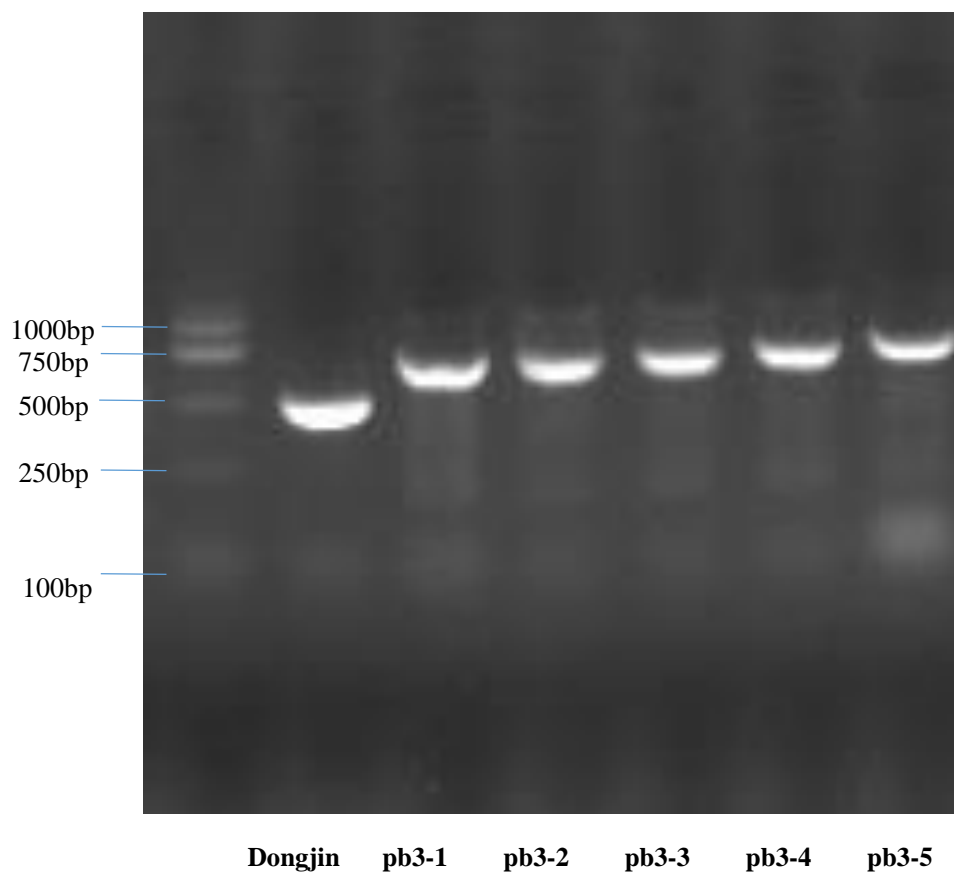

**Figure S2** Positive verification of mutants. We designed primers at both ends of the T-DNA and the insertion position to verify the positive results of the mutant material.

Table S1. Primers used in this study.

| Marker          | Forward(5' TO 3')           | Reverse(5' TO 3')            | Annotation                                              |
|-----------------|-----------------------------|------------------------------|---------------------------------------------------------|
| 44890q          | CAACCTGTTGACTCGTGATGGC      | ACGCGTAAATGCTCCTGGTGAA<br>G  | Primer for expression analysis of <i>LOC_Os11g44890</i> |
| 44910q          | AGAGCTTCAAGGTTGCAATGGA<br>G | TTGCCTCCGGCATTCTGTCTTC       | Primer for expression analysis of <i>LOC_Os11g44910</i> |
| 44930q          | CATGGGATTGAGGGCATTGAGC      | ATTGGGCATCTCACCGTGTGTC       | Primer for expression analysis of <i>LOC_Os11g44930</i> |
| 44950q          | CACTGCCACTGTCTCTACAAAG<br>G | CCAATAGCAATGTGATGCCTTTC<br>C | Primer for expression analysis of <i>LOC_Os11g44950</i> |
| 44990q          | GCTTGAAGCGTTGGTCATTGAG<br>G | TTCAGGGTTCTGACACCACTCC       | Primer for expression analysis of <i>LOC_Os11g44990</i> |
| 45030q          | TCTCCCTGCACATTGACCAAGC      | GTACTTGCCCTTGAGCCACTTC       | Primer for expression analysis of <i>LOC_Os11g45030</i> |
| Pb3q            | GAGGTTGGATCTTTGGGACTGC      | AGCTCCTTCAAGTTGGTCTGTCC      | Primer for expression analysis of <i>Pb3</i>            |
| CRISPR-testing  | GGGTATTTCTTTGGTTGTAG        | TCAACTTGTGTATCTTATAA         | Primer for testing the editing type of CRISPR Pb3 gene  |
| 50885q(Actin)   | AGGAAGGCTGGAAGAGGACC        | CGGGAAATTGTGAGGGACAT         | Internal control for expression analysis                |
| Pb3-CRISPR-gRNA | GATGCCTTGTTTGAGGAGGT        | TCAAGTTGGTCTGTCCAAGC         | Primer for <i>Pb3</i> gene CRISPR vector                |
| Pb3-T-DNA       | ATCGATTGGCTAGTTTTGA         | GTCTCAAACAGAGGACGGG          | Primer for positive verification of T-DNA mutants       |
| TDNA-LB1        | CTAGAGTCGAGAATTCAGTACA      |                              | Primer for positive verification of T-DNA mutants       |
